# Supplementary material for: Cardiovascular and cerebrovascular effects of caffeine maintenance in preterm infants during the transitional period
Source: Springer Nature journal article supplement (doi:10.1038/s41390-024-03194-4), 2024-05-22
Supplement: MOESM1 [file 41390_2024_3194_MOESM1_ESM.xlsx]

## Sheet: Foglio1
Supplemental Material.
Results of the multilevel mixed-effects linear models for each sutdy parameter.
	cTOI (%)				cFTOE (a.u.)				TOHRx (a.u.)				SpO2 (%)				HR (bpm)				PI (%)				CO (ml/kg/min)				SV (ml/kg)				ICON (a.u.)				SVR (dyn*s*cm-5)
Variables	B	95% CI		P	B	95% CI		P	B	95% CI		P	B	95% CI		P	B	95% CI		P	B	95% CI		P	B	95% CI		P	B	95% CI		P	B	95% CI		P	B	95% CI		P
Post-caffeine	-0.260	-1.186;	0.667	0.581	-0.001	-0.013;	0.010	0.839	-0.036	-0.068;	-0.005	0.022	-0.043	-0.453;	0.368	0.839	1297	-0.287;	2882	0.108	0.029	-0.045;	0.102	0.444	-0.009	-0.022;	0.003	0.143	-0.050	-0.152;	0.051	0.329	0.442	-4.041;	4925	0.846	0.623	0.199;	1048	0.004
Pre-caffeine (ref.)	0				0				0				0				0				0				0				0				0				0
IUGR	-1720	-5.422;	1982	0.361	0.015	-0.025;	0.056	0.460	0.089	0.028;	0.15	0.005	-0.420	-1.339;	0.499	0.369	-1493	-5.953;	2967	0.511	-0.026	-0.151;	0.099	0.686	0.014	-0.030;	0.057	0.539	0.105	-0.194;	0.404	0.489	32287	14.192;	50382	<0.001	4180	1.661;	6698	0.001
No IUGR (ref.)	0				0				0				0				0				0				0				0				0				0
HsPDA	1695	-0.231;	3622	0.084	-0.020	-0.043;	0.004	0.096	0.024	-0.029;	0.077	0.377	0.033	-0.705;	0.771	0.931	2132	-0.925;	5189	0.171	-0.028	-0.158;	0.103	0.676	0.022	-0.005;	0.049	0.111	0.128	-0.080;	0.337	0.227	-0.349	-10.912;	10214	0.948	-1001	-1.989;	0.013	0.052
No hsPDA (ref.)	0				0				0				0				0				0				0				0				0				0
Invasive ventilation	-2100	-5.780;	1.58	0.262	0.017	-0.026;	0.060	0.445	0.021	-0.059;	0.101	0.604	-1322	-2.479;	-0.166	0.025	-3651	-8.854;	1551	0.168	0.052	-0.134;	0.237	0.583	0.017	-0.036;	0.069	0.538	0.129	-0.257;	0.516	0.511	1301	-19.034;	21636	0.900	0.426	-1.880;	2731	0.858
Non-invasive ventilation (ref.)	0				0				0				0				0				0				0				0				0				0
Dopamine ongoing	-2256	-6.437;	1925	0.289	0.019	-0.028;	0.066	0.418	-0.066	-0.140;	0.008	0.078	0.470	-0.637;	1576	0.404	3754	-1.525;	9033	0.163	-0.003	-0.196;	0.191	0.980	-0.017	-0.065;	0.031	0.493	-0.126	-0.463;	0.212	0.464	14249	-5.904;	34402	0.165	5005	2.496;	7514	<0.001
Dopamine not ongoing (ref.)	0				0				0				0				0				0				0				0				0				0
Dobutamine, ongoing	-0.013	-3.240;	3214	0.994	-0.001	-0.039;	0.036	0.938	-0.027	-0.092;	0.039	0.423	-0.907	-1.865;	0.051	0.064	7217	2.809;	11626	0.001	-0.086	-0.240;	0.069	0.276	0.044	0.001;	0.086	0.043	0.319	0.010;	0.628	0.043	40699	24.379;	57018	<0.001	-1232	-3.014;	0.550	0.175
Dobutamine, not ongoing (ref.)	0				0				0				0				0				0				0				0				0				0
GA (weeks)	1179	0.411;	1947	0.003	-0.009	-0.018;	-0.001	0.031	-0.006	-0.020;	0.008	0.421	0.265	0.058;	0.472	0.012	-2212	-3.188;	-1236	<0.001	0.038	0.009;	0.068	0.012	0.003	-0.007;	0.013	0.535	0.034	-0.037;	0.104	0.347	-5414	-9.484;	-1344	0.009	-1575	-2.112;	-1039	<0.001
Abbreviations (in alphabetical order):
cFTOE: cerebral fractional tissue oxygen extraction
CO: cardiac output
cTOI: cerebral tissue oxygenation index
GA: gestational age
HR: heart rate
hsPDA: haemodynamically significant patent ductus arteriosus																												cm-5
ICON: contractility index
IUGR: intrauterine growth restriction
Ref: reference category
TOHRx: coefficient between cTOI and heart rate.
PI: perfusion index
SpO2: peripheral arterial oxygen saturation.
SV: stroke volume
SVR: systemic vascular resistance
